# Supplementary material for: Wing geometric morphometrics and microsatellite analysis provide similar discrimination of honey bee subspecies
Source: Springer Nature journal article supplement (doi:10.1007/s13592-014-0300-7), 2014-06-25
Supplement: MOESM1 [file 13592_2014_300_MOESM1_ESM.pdf]

## Wing geometric morphometrics and microsatellite analysis provide similar discrimination of honey bee subspecies

Oleksi Andrzej, Tofilski Adam

[olek@ukw.edu.pl](mailto:olek@ukw.edu.pl)

### Electronic supplementary material

**Table 1.** Classification functions for discrimination between pure *A. m. mellifera*, pure *A. m. carnica* and hybrids. The landmarks used for the discrimination were numbered as in Gerula et al. (2009).

| subspecies                  | 1x        | 1y     | 2x        | 2y       | 3x       | 3y       | 4x        | 5y       | 6x       | 6y      |
|-----------------------------|-----------|--------|-----------|----------|----------|----------|-----------|----------|----------|---------|
| pure <i>A. m. mellifera</i> | -143365.9 | 7176.1 | -152144.4 | -66638.6 | -95535.6 | -25670.1 | -112478.8 | -44227.0 | -94001.7 | 57427.6 |
| pure <i>A. m. carnica</i>   | -142999.8 | 7640.9 | -152327.5 | -67154.6 | -95208.3 | -26016.5 | -112199.0 | -44499.1 | -94185.2 | 58385.7 |
| hybrids                     | -143201.5 | 7467.5 | -152246.6 | -67004.5 | -95416.1 | -25820.3 | -112383.4 | -44357.0 | -94114.2 | 57825.3 |

Table 1. (continued)

| subspecies                  | 7x       | 8y    | 9x       | 9y      | 10x      | 10y      | 12x      | 12y      | 13x      | 13y      |
|-----------------------------|----------|-------|----------|---------|----------|----------|----------|----------|----------|----------|
| pure <i>A. m. mellifera</i> | -52655.3 | 767.7 | -54549.6 | 99479.3 | -61997.1 | -26420.2 | -20828.8 | -62294.3 | -39472.8 | -63505.5 |
| pure <i>A. m. carnica</i>   | -52539.2 | 476.2 | -54742.3 | 99702.6 | -61880.7 | -27007.6 | -20350.2 | -61798.9 | -39868.6 | -63630.9 |
| hybrids                     | -52620.2 | 760.6 | -54590.2 | 99479.3 | -62006.1 | -26645.6 | -20576.7 | -62093.6 | -39636.3 | -63508.5 |

Table 1. (continued)

| subspecies                  | 15x     | 16y      | 17y    | 18x      | 19x       | constant  |
|-----------------------------|---------|----------|--------|----------|-----------|-----------|
| pure <i>A. m. mellifera</i> | 34886.6 | -36730.1 | 7199.2 | 122406.6 | -200176.3 | -146328.3 |
| pure <i>A. m. carnica</i>   | 35044.4 | -37295.6 | 7422.6 | 122516.6 | -200007.7 | -146178.2 |
| hybrids                     | 34916.7 | -36869.8 | 7236.4 | 122426.3 | -200172.7 | -146303.2 |

**Table 2.** Mean values of aligned landmarks coordinates describing forewing. The landmarks were numbered as in Gerula et al. (2009).

| subspecies                  | 1x        | 1y        | 2x        | 2y        | 3x        | 3y       | 4x        | 4y        | 5x        | 5y        |
|-----------------------------|-----------|-----------|-----------|-----------|-----------|----------|-----------|-----------|-----------|-----------|
| pure <i>A. m. mellifera</i> | -0.288138 | -0.055095 | -0.247724 | -0.054449 | -0.195368 | 0.060703 | -0.183011 | -0.013575 | -0.163436 | -0.133246 |
| pure <i>A. m. carnica</i>   | -0.284708 | -0.055597 | -0.252373 | -0.057638 | -0.183364 | 0.062992 | -0.178185 | -0.013723 | -0.168178 | -0.139036 |
| hybrids                     | -0.286195 | -0.055370 | -0.249723 | -0.056219 | -0.190159 | 0.062038 | -0.180933 | -0.014013 | -0.165009 | -0.136436 |
| all (reference)             | -0.287141 | -0.055238 | -0.248885 | -0.055366 | -0.192355 | 0.061380 | -0.181805 | -0.013725 | -0.164481 | -0.134903 |

Table 2. (continued)

| subspecies                  | 6x        | 6y       | 7x       | 7y       | 8x        | 8y       | 9x       | 9y       | 10x      | 10y      |
|-----------------------------|-----------|----------|----------|----------|-----------|----------|----------|----------|----------|----------|
| pure <i>A. m. mellifera</i> | -0.071519 | 0.070673 | 0.006392 | 0.116259 | -0.010284 | 0.089323 | 0.053307 | 0.041179 | 0.011207 | 0.013150 |
| pure <i>A. m. carnica</i>   | -0.071806 | 0.073746 | 0.004130 | 0.119303 | -0.012549 | 0.091163 | 0.049782 | 0.041481 | 0.006603 | 0.010152 |
| hybrids                     | -0.072178 | 0.072148 | 0.004772 | 0.117659 | -0.010864 | 0.090701 | 0.052594 | 0.041341 | 0.008803 | 0.011330 |
| all (reference)             | -0.071751 | 0.071487 | 0.005633 | 0.117047 | -0.010732 | 0.089959 | 0.052668 | 0.041264 | 0.009930 | 0.012241 |

Table 2. (continued)

| subspecies                  | 11x      | 11y       | 12x      | 12y       | 13x      | 13y       | 14x      | 14y      | 15x      | 15y      |
|-----------------------------|----------|-----------|----------|-----------|----------|-----------|----------|----------|----------|----------|
| pure <i>A. m. mellifera</i> | 0.070366 | -0.036244 | 0.074175 | -0.100703 | 0.101159 | -0.146202 | 0.126171 | 0.103265 | 0.174366 | 0.059836 |
| pure <i>A. m. carnica</i>   | 0.067825 | -0.038568 | 0.075300 | -0.101015 | 0.099621 | -0.149650 | 0.125991 | 0.105890 | 0.174935 | 0.061106 |
| hybrids                     | 0.069929 | -0.037859 | 0.075903 | -0.100961 | 0.101904 | -0.147457 | 0.125686 | 0.104312 | 0.174034 | 0.060684 |
| all (reference)             | 0.069928 | -0.037009 | 0.074830 | -0.100818 | 0.101197 | -0.146995 | 0.126004 | 0.103896 | 0.174335 | 0.060244 |

Table 2. (continued)

| subspecies                  | 16x      | 16y      | 17x      | 17y       | 18x      | 18y       | 19x       | 19y       |
|-----------------------------|----------|----------|----------|-----------|----------|-----------|-----------|-----------|
| pure <i>A. m. mellifera</i> | 0.297293 | 0.000612 | 0.355199 | -0.005041 | 0.366061 | -0.047696 | -0.476215 | 0.0372514 |
| pure <i>A. m. carnica</i>   | 0.298738 | 0.000610 | 0.355035 | -0.004261 | 0.367203 | -0.046387 | -0.473999 | 0.0394298 |
| hybrids                     | 0.297617 | 0.000627 | 0.354227 | -0.005012 | 0.365755 | -0.047137 | -0.476163 | 0.0396246 |
| all (reference)             | 0.297565 | 0.000617 | 0.354887 | -0.004938 | 0.366107 | -0.047370 | -0.475932 | 0.0382269 |
